# Supplementary material for: miCDER: A Context-Aware Transformer Model for Joint miRNA-Disease Entity and Multi-level Regulatory Relation Extraction
Source: Research Square preprint supplement (doi:10.21203/rs.3.rs-7324339/v1), 2025-08-13
Supplement: Supplementary file 1 [file e92b4ab85951ce6bbc16828c.docx]

**Table S1. Definitions of Entity Types**

| Entity Type | Definition |
| --- | --- |
| MicroRNA | A small non-coding RNA molecule (~22 nucleotides) that regulates gene expression post-transcriptionally, often by binding to the 3'-UTR of target mRNAs. |
| Disease | A pathological condition in humans marked by abnormal physiological or biological states, like cancer, heart disease, or neurological disorders. |
| Gene | A sequence of DNA that encodes functional products, typically proteins, and is involved in various biological processes. |
| Cell | A basic structural and functional unit of living organisms, including specific cell types relevant to human physiology or pathology (e.g., fibroblasts, epithelial cells). |
| Pathway | A set of molecular interactions and biological reactions that lead to a specific cellular function or physiological outcome (e.g., PI3K-Akt pathway). |
| Protein | A macromolecule composed of amino acid chains that perform a wide range of biological functions, including enzymatic activity, signaling, and structural roles. |
| RNA | A nucleic acid involved in various biological roles, excluding microRNAs, such as lncRNA (long non-coding RNA), circRNA (circular RNA), or mRNA. |
| Biological Process | A series of events or molecular functions with a defined beginning and end, contributing to a broader biological objective (e.g., apoptosis, proliferation). |
| Therapy | A medical intervention or treatment strategy designed to alleviate or cure disease, including drugs, gene therapies, or surgical procedures. |
| Axis | A regulatory axis comprising multiple interacting biological components (e.g., miRNA–gene–pathway) that collectively influence a specific biological effect. |

**Table S2. Definitions of Relation Types**

| Relation Type | Definition |
| --- | --- |
| Upregulate | Indicates that the source entity increases the expression level or activity of the target entity. |
| Downregulate | Indicates that the source entity decreases the expression level or activity of the target entity. |
| Associate | Denotes a general connection or co-occurrence between two entities without specifying direction or causality. |
| Biomarker | Indicates that the source entity serves as a measurable indicator (biomarker) for the presence, progression, or treatment response of a disease. |
| Dysregulate | Refers to abnormal or disrupted regulation of the target entity by the source entity. |
| Negatively correlate | Indicates that an increase in the source entity is associated with a decrease in the target entity, or vice versa, without implying causation. |
| Negatively regulate | Indicates that the source entity reduces, suppresses, or inhibits the biological activity, expression, or function of the target entity through a regulatory mechanism. |
| Positively correlate | Indicates that an increase in the source entity is associated with an increase in the target entity, or both decrease together. |
| Promote | Indicates that the source entity enhances, activates, or facilitates the expression, activity, or biological function of the target entity. |
| Regulate | A general term indicating that the source entity influences the activity or expression of the target entity (direction unspecified). |
| Sponging | Describes a mechanism in which the source entity (typically a non-coding RNA) binds to and inhibits a miRNA, preventing it from acting on targets. |
| Target | Indicates that the source miRNA directly binds to the target gene or RNA, typically at the 3'-UTR, to regulate its expression. |
| Via | Indicates that the source miRNA directly binds to the target gene or RNA, typically at the 3'-UTR, to regulate its expression. |
